# Supplementary material for: Oral Epithelial Cells Expressing Low or Undetectable Levels of Human Angiotensin-Converting Enzyme 2 Are Susceptible to SARS-CoV-2 Virus Infection In Vitro
Source: MDPI journal article supplement (doi:10.3390/pathogens12060843), 2023-06-19
Supplement: s1 [file s1]

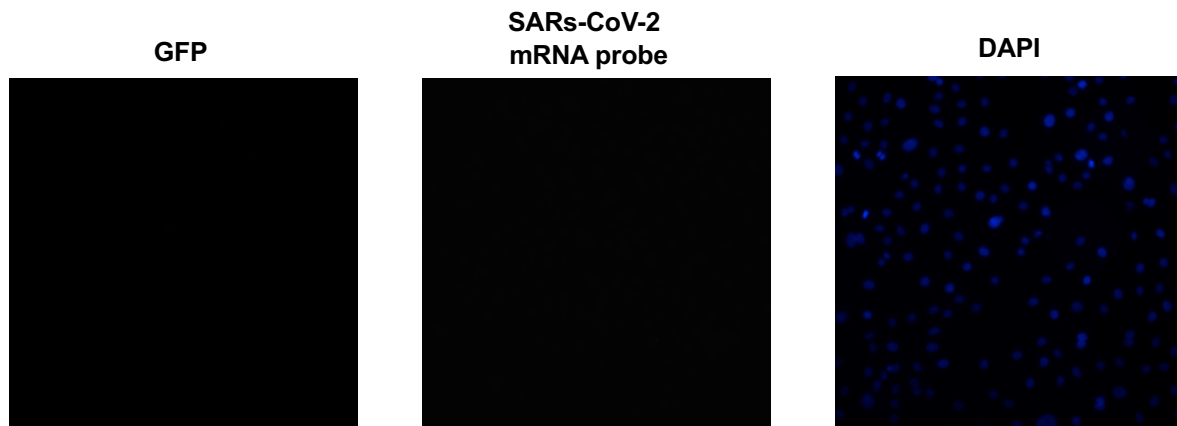

**Supplementary Figure 1. smFISH analysis of uninfected oral epithelial cells.** Uninfected oral gingival epithelial cells (hTERT TIGKs) were included in the experiment shown in Fig 5. Cells were probed with SARS-CoV-2 mRNA probes by smFISH followed by DAPI stain (blue). The result showed no GFP signal and SARS-CoV-2 mRNA was not detectable in uninfected cells.

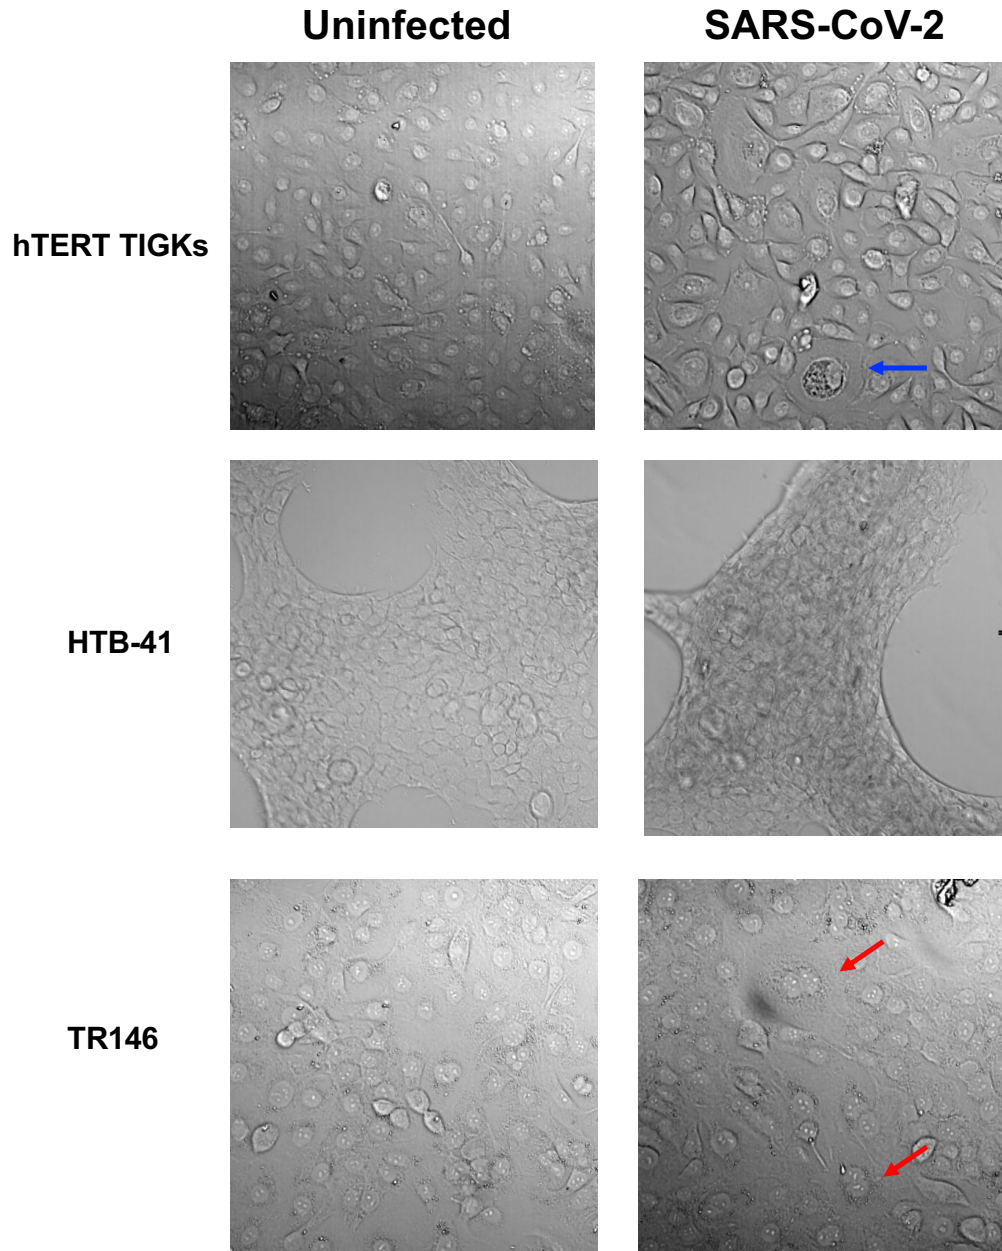

**Supplementary Figure 2. Brightfield images of oral epithelial cells with or without SARS-CoV-2 infection.** Oral gingival epithelial cells (hTERT TIGKs), salivary gland epithelial cells (A-253), and oral buccal epithelial cells (TR146) were infected by SARS-CoV-2 Wuhan strain expressing GFP as described in Fig 5. Blue and red arrows indicated the altered cell morphology. The images were taken at 48 h p.i. on a Zeiss Axiovert M200 microscope with a 20X objective.
